# Supplementary material
Source: publisher figshare collection journal article supplement (https://frontiersin.figshare.com/ndownloader/files/28922364)
Supplement: Supplementary file 1 [file 28922364]

## Sheet: Figure 1
	The data of the number of diamondback moth larvae and that of Cotesia vestalis cocoons on cabagge plants in 2010 for Figure 1							The data of the number of diamondback moth larvae and that of Cotesia vestalis cocoons on cabagge plants in 2011 for Figure 1
	Day	Plant	Treatment	Diamondback moth	Cotesia vestalis			Day	Plant	Treatment	Diamondback moth	Cotesia vestalis
	Jun25	C1	Control	0	0			Jul8	C1	Control	0	0
	Jun25	C2	Control	0	0			Jul8	C2	Control	0	0
	Jun25	C3	Control	0	0			Jul8	C3	Control	0	0
	Jun25	C4	Control	0	0			Jul8	C4	Control	1	0
	Jun25	C5	Control	0	0			Jul8	C5	Control	0	0
	Jun25	C6	Control	0	0			Jul8	C6	Control	0	0
	Jun25	C7	Control	0	0			Jul8	C7	Control	2	0
	Jun25	C8	Control	0	0			Jul8	C8	Control	0	0
	Jun25	C9	Control	0	0			Jul8	C9	Control	0	0
	Jun25	C10	Control	0	0			Jul8	C10	Control	0	0
	Jul2	C1	Control	2	0			Jul15	C1	Control	1	0
	Jul2	C2	Control	0	0			Jul15	C2	Control	5	0
	Jul2	C3	Control	0	0			Jul15	C3	Control	5	0
	Jul2	C4	Control	0	0			Jul15	C4	Control	11	0
	Jul2	C5	Control	0	0			Jul15	C5	Control	8	0
	Jul2	C6	Control	4	0			Jul15	C6	Control	0	0
	Jul2	C7	Control	0	0			Jul15	C7	Control	5	0
	Jul2	C8	Control	0	0			Jul15	C8	Control	2	0
	Jul2	C9	Control	2	0			Jul15	C9	Control	2	0
	Jul2	C10	Control	2	0			Jul15	C10	Control	3	0
	Jul17	C1	Control	0	1			Aug9	C1	Control	5	0
	Jul17	C2	Control	0	0			Aug9	C2	Control	0	2
	Jul17	C3	Control	0	0			Aug9	C3	Control	7	2
	Jul17	C4	Control	0	0			Aug9	C4	Control	7	0
	Jul17	C5	Control	0	0			Aug9	C5	Control	12	1
	Jul17	C6	Control	10	0			Aug9	C6	Control	15	1
	Jul17	C7	Control	0	0			Aug9	C7	Control	2	0
	Jul17	C8	Control	4	0			Aug9	C8	Control	5	0
	Jul17	C9	Control	0	0			Aug9	C9	Control	1	0
	Jul17	C10	Control	0	0			Aug9	C10	Control	4	0
	Jul22	C1	Control	30	0			Aug18	C1	Control	2	0
	Jul22	C2	Control	58	3			Aug18	C2	Control	1	0
	Jul22	C3	Control	18	0			Aug18	C3	Control	0	1
	Jul22	C4	Control	14	0			Aug18	C4	Control	0	1
	Jul22	C5	Control	12	0			Aug18	C5	Control	2	0
	Jul22	C6	Control	34	0			Aug18	C6	Control	2	1
	Jul22	C7	Control	6	2			Aug18	C7	Control	7	0
	Jul22	C8	Control	16	0			Aug18	C8	Control	3	0
	Jul22	C9	Control	22	2			Aug18	C9	Control	1	1
	Jul22	C10	Control	16	0			Aug18	C10	Control	8	0
	Aug4	C1	Control	66	3			Aug31	C1	Control	0	2
	Aug4	C2	Control	114	6			Aug31	C2	Control	0	0
	Aug4	C3	Control	130	0			Aug31	C3	Control	0	0
	Aug4	C4	Control	92	2			Aug31	C4	Control	0	0
	Aug4	C5	Control	58	1			Aug31	C5	Control	0	1
	Aug4	C6	Control	62	1			Aug31	C6	Control	0	1
	Aug4	C7	Control	24	0			Aug31	C7	Control	1	0
	Aug4	C8	Control	100	3			Aug31	C8	Control	0	0
	Aug4	C9	Control	92	2			Aug31	C9	Control	0	0
	Aug4	C10	Control	42	4			Aug31	C10	Control	0	0
	Aug26	C1	Control	2	14			Jul8	T1	Treated	1	0
	Aug26	C2	Control	2	12			Jul8	T2	Treated	1	0
	Aug26	C3	Control	6	4			Jul8	T3	Treated	0	0
	Aug26	C4	Control	0	5			Jul8	T4	Treated	3	0
	Aug26	C5	Control	2	3			Jul8	T5	Treated	17	0
	Aug26	C6	Control	0	3			Jul8	T6	Treated	0	0
	Aug26	C7	Control	0	2			Jul8	T7	Treated	10	0
	Aug26	C8	Control	0	3			Jul8	T8	Treated	0	0
	Aug26	C9	Control	0	3			Jul8	T9	Treated	0	0
	Aug26	C10	Control	2	2			Jul8	T10	Treated	0	0
	Sep3	C1	Control	0	3			Jul15	T1	Treated	0	0
	Sep3	C2	Control	0	2			Jul15	T2	Treated	4	0
	Sep3	C3	Control	0	2			Jul15	T3	Treated	0	0
	Sep3	C4	Control	0	9			Jul15	T4	Treated	1	1
	Sep3	C5	Control	0	1			Jul15	T5	Treated	1	2
	Sep3	C6	Control	0	2			Jul15	T6	Treated	1	0
	Sep3	C7	Control	0	0			Jul15	T7	Treated	0	0
	Sep3	C8	Control	0	1			Jul15	T8	Treated	2	0
	Sep3	C9	Control	0	0			Jul15	T9	Treated	0	0
	Sep3	C10	Control	0	0			Jul15	T10	Treated	0	0
	Sep10	C1	Control	0	1			Aug9	T1	Treated	1	0
	Sep10	C2	Control	0	0			Aug9	T2	Treated	8	0
	Sep10	C3	Control	0	2			Aug9	T3	Treated	3	0
	Sep10	C4	Control	0	4			Aug9	T4	Treated	9	0
	Sep10	C5	Control	0	1			Aug9	T5	Treated	6	0
	Sep10	C6	Control	0	1			Aug9	T6	Treated	6	0
	Sep10	C7	Control	0	1			Aug9	T7	Treated	1	0
	Sep10	C8	Control	0	0			Aug9	T8	Treated	6	0
	Sep10	C9	Control	0	0			Aug9	T9	Treated	3	0
	Sep10	C10	Control	0	0			Aug9	T10	Treated	3	0
	Jun25	T1	Treated	0	0			Aug18	T1	Treated	0	0
	Jun25	T2	Treated	0	0			Aug18	T2	Treated	5	1
	Jun25	T3	Treated	0	0			Aug18	T3	Treated	1	0
	Jun25	T4	Treated	0	0			Aug18	T4	Treated	3	2
	Jun25	T5	Treated	0	0			Aug18	T5	Treated	9	8
	Jun25	T6	Treated	0	0			Aug18	T6	Treated	5	0
	Jun25	T7	Treated	0	0			Aug18	T7	Treated	6	1
	Jun25	T8	Treated	0	0			Aug18	T8	Treated	7	2
	Jun25	T9	Treated	0	0			Aug18	T9	Treated	1	0
	Jun25	T10	Treated	0	0			Aug18	T10	Treated	2	0
	Jul2	T1	Treated	0	0			Aug31	T1	Treated	0	0
	Jul2	T2	Treated	0	0			Aug31	T2	Treated	1	2
	Jul2	T3	Treated	0	0			Aug31	T3	Treated	1	3
	Jul2	T4	Treated	0	0			Aug31	T4	Treated	0	3
	Jul2	T5	Treated	0	0			Aug31	T5	Treated	0	2
	Jul2	T6	Treated	0	0			Aug31	T6	Treated	1	0
	Jul2	T7	Treated	0	0			Aug31	T7	Treated	0	0
	Jul2	T8	Treated	0	0			Aug31	T8	Treated	0	0
	Jul2	T9	Treated	0	0			Aug31	T9	Treated	0	0
	Jul2	T10	Treated	0	0			Aug31	T10	Treated	0	1
	Jul17	T1	Treated	0	0
	Jul17	T2	Treated	4	0
	Jul17	T3	Treated	0	0
	Jul17	T4	Treated	2	1
	Jul17	T5	Treated	0	0
	Jul17	T6	Treated	2	0
	Jul17	T7	Treated	6	0
	Jul17	T8	Treated	0	0
	Jul17	T9	Treated	0	0
	Jul17	T10	Treated	0	0
	Jul22	T1	Treated	6	1
	Jul22	T2	Treated	16	1
	Jul22	T3	Treated	4	1
	Jul22	T4	Treated	4	2
	Jul22	T5	Treated	4	0
	Jul22	T6	Treated	8	2
	Jul22	T7	Treated	6	0
	Jul22	T8	Treated	6	0
	Jul22	T9	Treated	2	1
	Jul22	T10	Treated	4	0
	Aug4	T1	Treated	0	0
	Aug4	T2	Treated	4	0
	Aug4	T3	Treated	10	4
	Aug4	T4	Treated	6	1
	Aug4	T5	Treated	24	0
	Aug4	T6	Treated	48	4
	Aug4	T7	Treated	6	1
	Aug4	T8	Treated	2	3
	Aug4	T9	Treated	0	0
	Aug4	T10	Treated	10	0
	Aug26	T1	Treated	2	1
	Aug26	T2	Treated	4	12
	Aug26	T3	Treated	0	6
	Aug26	T4	Treated	2	5
	Aug26	T5	Treated	6	8
	Aug26	T6	Treated	0	2
	Aug26	T7	Treated	0	0
	Aug26	T8	Treated	2	4
	Aug26	T9	Treated	0	3
	Aug26	T10	Treated	12	2
	Sep3	T1	Treated	0	0
	Sep3	T2	Treated	0	5
	Sep3	T3	Treated	0	0
	Sep3	T4	Treated	0	2
	Sep3	T5	Treated	0	1
	Sep3	T6	Treated	0	1
	Sep3	T7	Treated	0	1
	Sep3	T8	Treated	0	0
	Sep3	T9	Treated	0	1
	Sep3	T10	Treated	0	0
	Sep10	T1	Treated	0	0
	Sep10	T2	Treated	0	5
	Sep10	T3	Treated	0	0
	Sep10	T4	Treated	0	2
	Sep10	T5	Treated	0	1
	Sep10	T6	Treated	0	1
	Sep10	T7	Treated	0	1
	Sep10	T8	Treated	0	0
	Sep10	T9	Treated	0	1
	Sep10	T10	Treated	0	0

## Sheet: Figure 2
	The data of the number of diamondback moth larvae and that of Cotesia vestalis cocoons on cabagge plants in 2010 for Figure 2							The data of the number of diamondback moth larvae and that of Cotesia vestalis cocoons on cabagge plants in 2011 for Figure 2
	Treatment	Diamondback moth	Cotesia vestalis					Treatment	Diamondback moth	Cotesia vestalis
	Control	0	0					Control	0	0
	Control	0	0					Control	0	0
	Control	0	0					Control	0	0
	Control	0	0					Control	1	0
	Control	0	0					Control	0	0
	Control	0	0					Control	0	0
	Control	0	0					Control	2	0
	Control	0	0					Control	0	0
	Control	0	0					Control	0	0
	Control	0	0					Control	0	0
	Control	2	0					Treated	1	0
	Control	0	0					Treated	1	0
	Control	0	0					Treated	0	0
	Control	0	0					Treated	3	0
	Control	0	0					Treated	17	0
	Control	4	0					Treated	0	0
	Control	0	0					Treated	10	0
	Control	0	0					Treated	0	0
	Control	2	0					Treated	0	0
	Control	2	0					Treated	0	0
	Control	0	1					Control	1	0
	Control	0	0					Control	5	0
	Control	0	0					Control	5	0
	Control	0	0					Control	11	0
	Control	0	0					Control	8	0
	Control	10	0					Control	0	0
	Control	0	0					Control	5	0
	Control	4	0					Control	2	0
	Control	0	0					Control	2	0
	Control	0	0					Control	3	0
	Control	30	0					Treated	0	0
	Control	58	3					Treated	4	0
	Control	18	0					Treated	0	0
	Control	14	0					Treated	1	1
	Control	12	0					Treated	1	2
	Control	34	0					Treated	1	0
	Control	6	2					Treated	0	0
	Control	16	0					Treated	2	0
	Control	22	2					Treated	0	0
	Control	16	0					Treated	0	0
	Control	66	3					Control	5	0
	Control	114	6					Control	0	2
	Control	130	0					Control	7	2
	Control	92	2					Control	7	0
	Control	58	1					Control	12	1
	Control	62	1					Control	15	1
	Control	24	0					Control	2	0
	Control	100	3					Control	5	0
	Control	92	2					Control	1	0
	Control	42	4					Control	4	0
	Control	2	14					Treated	1	0
	Control	2	12					Treated	8	0
	Control	6	4					Treated	3	0
	Control	0	5					Treated	9	0
	Control	2	3					Treated	6	0
	Control	0	3					Treated	6	0
	Control	0	2					Treated	1	0
	Control	0	3					Treated	6	0
	Control	0	3					Treated	3	0
	Control	2	2					Treated	3	0
	Control	0	3					Control	2	0
	Control	0	2					Control	1	0
	Control	0	2					Control	0	1
	Control	0	9					Control	0	1
	Control	0	1					Control	2	0
	Control	0	2					Control	2	1
	Control	0	0					Control	7	0
	Control	0	1					Control	3	0
	Control	0	0					Control	1	1
	Control	0	0					Control	8	0
	Control	0	1					Treated	0	0
	Control	0	0					Treated	5	1
	Control	0	2					Treated	1	0
	Control	0	4					Treated	3	2
	Control	0	1					Treated	9	8
	Control	0	1					Treated	5	0
	Control	0	1					Treated	6	1
	Control	0	0					Treated	7	2
	Control	0	0					Treated	1	0
	Control	0	0					Treated	2	0
	Treated	0	0					Control	0	2
	Treated	0	0					Control	0	0
	Treated	0	0					Control	0	0
	Treated	0	0					Control	0	0
	Treated	0	0					Control	0	1
	Treated	0	0					Control	0	1
	Treated	0	0					Control	1	0
	Treated	0	0					Control	0	0
	Treated	0	0					Control	0	0
	Treated	0	0					Control	0	0
	Treated	0	0					Treated	0	0
	Treated	0	0					Treated	1	2
	Treated	0	0					Treated	1	3
	Treated	0	0					Treated	0	3
	Treated	0	0					Treated	0	2
	Treated	0	0					Treated	1	0
	Treated	0	0					Treated	0	0
	Treated	0	0					Treated	0	0
	Treated	0	0					Treated	0	0
	Treated	0	0					Treated	0	1
	Treated	0	0
	Treated	4	0
	Treated	0	0
	Treated	2	1
	Treated	0	0
	Treated	2	0
	Treated	6	0
	Treated	0	0
	Treated	0	0
	Treated	0	0
	Treated	6	1
	Treated	16	1
	Treated	4	1
	Treated	4	2
	Treated	4	0
	Treated	8	2
	Treated	6	0
	Treated	6	0
	Treated	2	1
	Treated	4	0
	Treated	0	0
	Treated	4	0
	Treated	10	4
	Treated	6	1
	Treated	24	0
	Treated	48	4
	Treated	6	1
	Treated	2	3
	Treated	0	0
	Treated	10	0
	Treated	2	1
	Treated	4	12
	Treated	0	6
	Treated	2	5
	Treated	6	8
	Treated	0	2
	Treated	0	0
	Treated	2	4
	Treated	0	3
	Treated	12	2
	Treated	0	0
	Treated	0	5
	Treated	0	0
	Treated	0	2
	Treated	0	1
	Treated	0	1
	Treated	0	1
	Treated	0	0
	Treated	0	1
	Treated	0	0
	Treated	0	0
	Treated	0	5
	Treated	0	0
	Treated	0	2
	Treated	0	1
	Treated	0	1
	Treated	0	1
	Treated	0	0
	Treated	0	1
	Treated	0	0

## Sheet: Figure 3
	The data of the number of aphids and parasitized aphids (mummies) on cabagge plants in 2010 for Figure 3							The data of the number of aphids and parasitized aphids (mummies) on cabagge plants in 2011 for Figure 3
	Day	Plant	Treatment	Aphid	mummy			Day	Plant	Treatment	Aphid	mummy
	Jun25	C1	Control	0	0			Jul8	C1	Control	0	0
	Jun25	C2	Control	0	0			Jul8	C2	Control	0	0
	Jun25	C3	Control	0	0			Jul8	C3	Control	0	1
	Jun25	C4	Control	0	0			Jul8	C4	Control	0	0
	Jun25	C5	Control	0	0			Jul8	C5	Control	0	0
	Jun25	C6	Control	0	1			Jul8	C6	Control	0	0
	Jun25	C7	Control	1	0			Jul8	C7	Control	0	0
	Jun25	C8	Control	0	0			Jul8	C8	Control	0	0
	Jun25	C9	Control	0	0			Jul8	C9	Control	0	0
	Jun25	C10	Control	0	0			Jul8	C10	Control	0	0
	Jul2	C1	Control	0	0			Jul15	C1	Control	0	0
	Jul2	C2	Control	0	3			Jul15	C2	Control	0	0
	Jul2	C3	Control	20	0			Jul15	C3	Control	0	0
	Jul2	C4	Control	0	0			Jul15	C4	Control	0	0
	Jul2	C5	Control	0	1			Jul15	C5	Control	0	0
	Jul2	C6	Control	0	0			Jul15	C6	Control	0	0
	Jul2	C7	Control	0	0			Jul15	C7	Control	0	0
	Jul2	C8	Control	36	2			Jul15	C8	Control	0	0
	Jul2	C9	Control	0	0			Jul15	C9	Control	0	0
	Jul2	C10	Control	0	0			Jul15	C10	Control	0	0
	Jul17	C1	Control	3	0			Aug9	C1	Control	348	8
	Jul17	C2	Control	0	0			Aug9	C2	Control	2	0
	Jul17	C3	Control	0	0			Aug9	C3	Control	0	0
	Jul17	C4	Control	0	0			Aug9	C4	Control	0	0
	Jul17	C5	Control	0	0			Aug9	C5	Control	77	0
	Jul17	C6	Control	15	1			Aug9	C6	Control	114	0
	Jul17	C7	Control	69	25			Aug9	C7	Control	0	0
	Jul17	C8	Control	13	0			Aug9	C8	Control	0	0
	Jul17	C9	Control	243	0			Aug9	C9	Control	9	0
	Jul17	C10	Control	3	0			Aug9	C10	Control	38	0
	Jul22	C1	Control	7	0			Aug18	C1	Control	44	0
	Jul22	C2	Control	3	0			Aug18	C2	Control	98	14
	Jul22	C3	Control	2	0			Aug18	C3	Control	0	0
	Jul22	C4	Control	34	0			Aug18	C4	Control	12	0
	Jul22	C5	Control	0	0			Aug18	C5	Control	15	0
	Jul22	C6	Control	182	0			Aug18	C6	Control	125	5
	Jul22	C7	Control	21	0			Aug18	C7	Control	0	0
	Jul22	C8	Control	13	0			Aug18	C8	Control	31	0
	Jul22	C9	Control	31	1			Aug18	C9	Control	28	4
	Jul22	C10	Control	35	0			Aug18	C10	Control	72	3
	Aug4	C1	Control	71	0			Aug31	C1	Control	1	0
	Aug4	C2	Control	269	0			Aug31	C2	Control	8	0
	Aug4	C3	Control	43	0			Aug31	C3	Control	9	0
	Aug4	C4	Control	93	0			Aug31	C4	Control	234	0
	Aug4	C5	Control	20	0			Aug31	C5	Control	129	3
	Aug4	C6	Control	108	0			Aug31	C6	Control	171	5
	Aug4	C7	Control	11	0			Aug31	C7	Control	53	0
	Aug4	C8	Control	194	0			Aug31	C8	Control	42	0
	Aug4	C9	Control	113	0			Aug31	C9	Control	44	2
	Aug4	C10	Control	205	0			Aug31	C10	Control	45	4
	Aug26	C1	Control	63	44			Jul8	T1	Treated	1	0
	Aug26	C2	Control	377	0			Jul8	T2	Treated	0	0
	Aug26	C3	Control	146	0			Jul8	T3	Treated	0	0
	Aug26	C4	Control	250	3			Jul8	T4	Treated	0	0
	Aug26	C5	Control	313	13			Jul8	T5	Treated	0	0
	Aug26	C6	Control	46	6			Jul8	T6	Treated	11	0
	Aug26	C7	Control	102	0			Jul8	T7	Treated	6	0
	Aug26	C8	Control	417	43			Jul8	T8	Treated	0	0
	Aug26	C9	Control	377	17			Jul8	T9	Treated	0	0
	Aug26	C10	Control	20	0			Jul8	T10	Treated	0	0
	Sep3	C1	Control	42	9			Jul15	T1	Treated	0	0
	Sep3	C2	Control	25	1			Jul15	T2	Treated	0	0
	Sep3	C3	Control	0	0			Jul15	T3	Treated	0	0
	Sep3	C4	Control	549	10			Jul15	T4	Treated	0	0
	Sep3	C5	Control	1245	13			Jul15	T5	Treated	0	0
	Sep3	C6	Control	8	15			Jul15	T6	Treated	0	0
	Sep3	C7	Control	0	0			Jul15	T7	Treated	0	0
	Sep3	C8	Control	147	15			Jul15	T8	Treated	0	0
	Sep3	C9	Control	21	0			Jul15	T9	Treated	0	0
	Sep3	C10	Control	0	5			Jul15	T10	Treated	0	0
	Sep10	C1	Control	0	0			Aug9	T1	Treated	1067	5
	Sep10	C2	Control	0	0			Aug9	T2	Treated	716	0
	Sep10	C3	Control	40	0			Aug9	T3	Treated	320	0
	Sep10	C4	Control	2035	4			Aug9	T4	Treated	23	0
	Sep10	C5	Control	1310	12			Aug9	T5	Treated	16	0
	Sep10	C6	Control	0	0			Aug9	T6	Treated	140	2
	Sep10	C7	Control	10	0			Aug9	T7	Treated	43	0
	Sep10	C8	Control	0	0			Aug9	T8	Treated	685	0
	Sep10	C9	Control	0	0			Aug9	T9	Treated	501	0
	Sep10	C10	Control	0	0			Aug9	T10	Treated	853	3
	Jun25	T1	Treated	0	0			Aug18	T1	Treated	1676	5
	Jun25	T2	Treated	0	0			Aug18	T2	Treated	1512	0
	Jun25	T3	Treated	0	0			Aug18	T3	Treated	82	0
	Jun25	T4	Treated	0	0			Aug18	T4	Treated	210	0
	Jun25	T5	Treated	0	0			Aug18	T5	Treated	63	0
	Jun25	T6	Treated	0	0			Aug18	T6	Treated	134	0
	Jun25	T7	Treated	1	0			Aug18	T7	Treated	305	1
	Jun25	T8	Treated	0	0			Aug18	T8	Treated	2645	0
	Jun25	T9	Treated	0	0			Aug18	T9	Treated	1067	6
	Jun25	T10	Treated	0	0			Aug18	T10	Treated	1502	5
	Jul2	T1	Treated	0	0			Aug31	T1	Treated	2051	47
	Jul2	T2	Treated	252	22			Aug31	T2	Treated	144	37
	Jul2	T3	Treated	0	0			Aug31	T3	Treated	378	12
	Jul2	T4	Treated	0	0			Aug31	T4	Treated	314	20
	Jul2	T5	Treated	330	0			Aug31	T5	Treated	28	1
	Jul2	T6	Treated	0	0			Aug31	T6	Treated	69	3
	Jul2	T7	Treated	12	0			Aug31	T7	Treated	2058	91
	Jul2	T8	Treated	0	0			Aug31	T8	Treated	278	6
	Jul2	T9	Treated	0	0			Aug31	T9	Treated	2852	60
	Jul2	T10	Treated	0	0			Aug31	T10	Treated	1403	25
	Jul17	T1	Treated	0	0
	Jul17	T2	Treated	35	0
	Jul17	T3	Treated	0	0
	Jul17	T4	Treated	0	0
	Jul17	T5	Treated	0	0
	Jul17	T6	Treated	0	0
	Jul17	T7	Treated	4	0
	Jul17	T8	Treated	0	0
	Jul17	T9	Treated	0	0
	Jul17	T10	Treated	0	0
	Jul22	T1	Treated	15	0
	Jul22	T2	Treated	13	0
	Jul22	T3	Treated	26	1
	Jul22	T4	Treated	0	0
	Jul22	T5	Treated	7	0
	Jul22	T6	Treated	16	0
	Jul22	T7	Treated	0	0
	Jul22	T8	Treated	3	0
	Jul22	T9	Treated	15	0
	Jul22	T10	Treated	0	0
	Aug4	T1	Treated	32	0
	Aug4	T2	Treated	4	9
	Aug4	T3	Treated	15	0
	Aug4	T4	Treated	8	0
	Aug4	T5	Treated	130	0
	Aug4	T6	Treated	166	1
	Aug4	T7	Treated	8	0
	Aug4	T8	Treated	78	0
	Aug4	T9	Treated	6	0
	Aug4	T10	Treated	0	0
	Aug26	T1	Treated	88	60
	Aug26	T2	Treated	62	64
	Aug26	T3	Treated	56	61
	Aug26	T4	Treated	167	17
	Aug26	T5	Treated	9	4
	Aug26	T6	Treated	24	0
	Aug26	T7	Treated	9	0
	Aug26	T8	Treated	17	1
	Aug26	T9	Treated	26	0
	Aug26	T10	Treated	126	98
	Sep3	T1	Treated	0	0
	Sep3	T2	Treated	21	34
	Sep3	T3	Treated	0	0
	Sep3	T4	Treated	2	0
	Sep3	T5	Treated	4	0
	Sep3	T6	Treated	1	3
	Sep3	T7	Treated	0	0
	Sep3	T8	Treated	0	0
	Sep3	T9	Treated	1	0
	Sep3	T10	Treated	1	1
	Sep10	T1	Treated	0	0
	Sep10	T2	Treated	3	0
	Sep10	T3	Treated	0	0
	Sep10	T4	Treated	0	0
	Sep10	T5	Treated	0	0
	Sep10	T6	Treated	2	0
	Sep10	T7	Treated	1	0
	Sep10	T8	Treated	1	3
	Sep10	T9	Treated	0	0
	Sep10	T10	Treated	1	0

## Sheet: Figure 4
	The data of the number of Pieris rapae larvae and that of cocoon clusters of Cotesia glomerata on cabagge plants in 2010 for Figure 4							The data of the number of Pieris rapae larvae and that of cocoon clusters of Cotesia glomerata on cabagge plants in 2011 for Figure 4
	Day	Plant	Treatment	Pieris rapae	Cotesia glomerata			Day	Plant	Treatment	Pieris rapae	Cotesia glomerata
	Jun25	C1	Control	5	0			Jul8	C1	Control	0	0
	Jun25	C2	Control	6	0			Jul8	C2	Control	2	0
	Jun25	C3	Control	6	0			Jul8	C3	Control	0	1
	Jun25	C4	Control	4	0			Jul8	C4	Control	0	2
	Jun25	C5	Control	0	0			Jul8	C5	Control	1	1
	Jun25	C6	Control	0	0			Jul8	C6	Control	1	0
	Jun25	C7	Control	3	0			Jul8	C7	Control	0	1
	Jun25	C8	Control	3	0			Jul8	C8	Control	1	2
	Jun25	C9	Control	2	0			Jul8	C9	Control	0	0
	Jun25	C10	Control	1	0			Jul8	C10	Control	0	0
	Jul2	C1	Control	12	1			Jul15	C1	Control	3	1
	Jul2	C2	Control	4	0			Jul15	C2	Control	7	0
	Jul2	C3	Control	4	1			Jul15	C3	Control	15	0
	Jul2	C4	Control	2	1			Jul15	C4	Control	14	0
	Jul2	C5	Control	9	0			Jul15	C5	Control	22	1
	Jul2	C6	Control	5	0			Jul15	C6	Control	11	0
	Jul2	C7	Control	3	0			Jul15	C7	Control	3	0
	Jul2	C8	Control	13	0			Jul15	C8	Control	9	0
	Jul2	C9	Control	3	1			Jul15	C9	Control	11	0
	Jul2	C10	Control	13	1			Jul15	C10	Control	12	0
	Jul17	C1	Control	2	2			Aug9	C1	Control	0	0
	Jul17	C2	Control	0	0			Aug9	C2	Control	0	0
	Jul17	C3	Control	1	2			Aug9	C3	Control	0	0
	Jul17	C4	Control	1	0			Aug9	C4	Control	0	0
	Jul17	C5	Control	0	2			Aug9	C5	Control	0	0
	Jul17	C6	Control	4	2			Aug9	C6	Control	0	0
	Jul17	C7	Control	2	0			Aug9	C7	Control	0	0
	Jul17	C8	Control	6	1			Aug9	C8	Control	0	0
	Jul17	C9	Control	0	0			Aug9	C9	Control	0	0
	Jul17	C10	Control	1	1			Aug9	C10	Control	0	0
	Jul22	C1	Control	35	0			Aug18	C1	Control	0	0
	Jul22	C2	Control	34	0			Aug18	C2	Control	1	0
	Jul22	C3	Control	25	0			Aug18	C3	Control	0	0
	Jul22	C4	Control	43	0			Aug18	C4	Control	0	0
	Jul22	C5	Control	26	2			Aug18	C5	Control	3	0
	Jul22	C6	Control	53	1			Aug18	C6	Control	1	0
	Jul22	C7	Control	32	0			Aug18	C7	Control	2	0
	Jul22	C8	Control	58	0			Aug18	C8	Control	2	0
	Jul22	C9	Control	78	0			Aug18	C9	Control	0	0
	Jul22	C10	Control	32	0			Aug18	C10	Control	0	0
	Aug4	C1	Control	0	7			Aug31	C1	Control	0	0
	Aug4	C2	Control	2	1			Aug31	C2	Control	0	0
	Aug4	C3	Control	1	1			Aug31	C3	Control	0	0
	Aug4	C4	Control	1	4			Aug31	C4	Control	0	0
	Aug4	C5	Control	1	0			Aug31	C5	Control	0	0
	Aug4	C6	Control	0	1			Aug31	C6	Control	2	0
	Aug4	C7	Control	0	8			Aug31	C7	Control	0	1
	Aug4	C8	Control	0	3			Aug31	C8	Control	0	1
	Aug4	C9	Control	1	14			Aug31	C9	Control	0	0
	Aug4	C10	Control	0	7			Aug31	C10	Control	0	0
	Aug26	C1	Control	2	0			Jul8	T1	Treated	0	0
	Aug26	C2	Control	0	0			Jul8	T2	Treated	0	2
	Aug26	C3	Control	0	1			Jul8	T3	Treated	0	1
	Aug26	C4	Control	0	0			Jul8	T4	Treated	0	1
	Aug26	C5	Control	1	2			Jul8	T5	Treated	2	0
	Aug26	C6	Control	0	1			Jul8	T6	Treated	1	1
	Aug26	C7	Control	0	0			Jul8	T7	Treated	0	1
	Aug26	C8	Control	0	0			Jul8	T8	Treated	2	1
	Aug26	C9	Control	0	2			Jul8	T9	Treated	1	2
	Aug26	C10	Control	0	0			Jul8	T10	Treated	1	0
	Sep3	C1	Control	0	0			Jul15	T1	Treated	3	0
	Sep3	C2	Control	0	0			Jul15	T2	Treated	3	0
	Sep3	C3	Control	0	0			Jul15	T3	Treated	5	2
	Sep3	C4	Control	0	2			Jul15	T4	Treated	11	1
	Sep3	C5	Control	0	0			Jul15	T5	Treated	1	0
	Sep3	C6	Control	0	0			Jul15	T6	Treated	2	0
	Sep3	C7	Control	0	1			Jul15	T7	Treated	7	0
	Sep3	C8	Control	0	0			Jul15	T8	Treated	4	0
	Sep3	C9	Control	1	0			Jul15	T9	Treated	6	1
	Sep3	C10	Control	0	1			Jul15	T10	Treated	8	0
	Sep10	C1	Control	0	0			Aug9	T1	Treated	0	0
	Sep10	C2	Control	0	0			Aug9	T2	Treated	1	0
	Sep10	C3	Control	0	0			Aug9	T3	Treated	0	0
	Sep10	C4	Control	0	0			Aug9	T4	Treated	0	0
	Sep10	C5	Control	0	1			Aug9	T5	Treated	1	0
	Sep10	C6	Control	0	0			Aug9	T6	Treated	0	0
	Sep10	C7	Control	0	0			Aug9	T7	Treated	0	0
	Sep10	C8	Control	0	0			Aug9	T8	Treated	0	0
	Sep10	C9	Control	0	0			Aug9	T9	Treated	1	0
	Sep10	C10	Control	0	0			Aug9	T10	Treated	0	0
	Jun25	T1	Treated	0	0			Aug18	T1	Treated	4	0
	Jun25	T2	Treated	6	0			Aug18	T2	Treated	1	0
	Jun25	T3	Treated	3	0			Aug18	T3	Treated	1	0
	Jun25	T4	Treated	1	0			Aug18	T4	Treated	3	0
	Jun25	T5	Treated	2	0			Aug18	T5	Treated	2	0
	Jun25	T6	Treated	1	0			Aug18	T6	Treated	5	0
	Jun25	T7	Treated	2	0			Aug18	T7	Treated	1	0
	Jun25	T8	Treated	1	0			Aug18	T8	Treated	1	0
	Jun25	T9	Treated	4	0			Aug18	T9	Treated	2	0
	Jun25	T10	Treated	4	0			Aug18	T10	Treated	1	0
	Jul2	T1	Treated	23	0			Aug31	T1	Treated	0	0
	Jul2	T2	Treated	6	1			Aug31	T2	Treated	0	0
	Jul2	T3	Treated	9	3			Aug31	T3	Treated	1	0
	Jul2	T4	Treated	3	0			Aug31	T4	Treated	0	0
	Jul2	T5	Treated	14	0			Aug31	T5	Treated	0	0
	Jul2	T6	Treated	13	0			Aug31	T6	Treated	0	0
	Jul2	T7	Treated	14	3			Aug31	T7	Treated	0	0
	Jul2	T8	Treated	10	1			Aug31	T8	Treated	0	0
	Jul2	T9	Treated	15	0			Aug31	T9	Treated	0	0
	Jul2	T10	Treated	13	1			Aug31	T10	Treated	0	0
	Jul17	T1	Treated	0	1
	Jul17	T2	Treated	0	0
	Jul17	T3	Treated	0	0
	Jul17	T4	Treated	0	2
	Jul17	T5	Treated	0	0
	Jul17	T6	Treated	0	0
	Jul17	T7	Treated	0	0
	Jul17	T8	Treated	0	1
	Jul17	T9	Treated	0	0
	Jul17	T10	Treated	1	0
	Jul22	T1	Treated	47	1
	Jul22	T2	Treated	33	0
	Jul22	T3	Treated	20	1
	Jul22	T4	Treated	19	0
	Jul22	T5	Treated	36	0
	Jul22	T6	Treated	38	0
	Jul22	T7	Treated	31	0
	Jul22	T8	Treated	39	0
	Jul22	T9	Treated	45	0
	Jul22	T10	Treated	21	0
	Aug4	T1	Treated	0	3
	Aug4	T2	Treated	1	3
	Aug4	T3	Treated	0	1
	Aug4	T4	Treated	0	2
	Aug4	T5	Treated	0	6
	Aug4	T6	Treated	0	2
	Aug4	T7	Treated	0	0
	Aug4	T8	Treated	0	3
	Aug4	T9	Treated	1	1
	Aug4	T10	Treated	0	3
	Aug26	T1	Treated	2	1
	Aug26	T2	Treated	3	1
	Aug26	T3	Treated	5	0
	Aug26	T4	Treated	0	0
	Aug26	T5	Treated	3	1
	Aug26	T6	Treated	3	0
	Aug26	T7	Treated	1	1
	Aug26	T8	Treated	0	1
	Aug26	T9	Treated	3	1
	Aug26	T10	Treated	3	0
	Sep3	T1	Treated	15	0
	Sep3	T2	Treated	1	1
	Sep3	T3	Treated	0	0
	Sep3	T4	Treated	0	0
	Sep3	T5	Treated	0	0
	Sep3	T6	Treated	7	0
	Sep3	T7	Treated	3	0
	Sep3	T8	Treated	0	0
	Sep3	T9	Treated	0	2
	Sep3	T10	Treated	5	1
	Sep10	T1	Treated	15	0
	Sep10	T2	Treated	1	1
	Sep10	T3	Treated	0	0
	Sep10	T4	Treated	0	0
	Sep10	T5	Treated	0	0
	Sep10	T6	Treated	7	0
	Sep10	T7	Treated	3	0
	Sep10	T8	Treated	0	0
	Sep10	T9	Treated	0	2
	Sep10	T10	Treated	5	1

## Sheet: Figure 5
	The data of the number of Plusiinae larvae on cabagge plants in 2010 for Figure 5						The data of the number of Plusiinae larvae on cabagge plants in 2011 for Figure 5
	Day	Plant	Treatment	Plusiinae larvae			Day	Plant	Treatment	Plusiinae larvae
	Jun25	C1	Control	2			Jul8	C1	Control	0
	Jun25	C2	Control	3			Jul8	C2	Control	0
	Jun25	C3	Control	4			Jul8	C3	Control	0
	Jun25	C4	Control	6			Jul8	C4	Control	0
	Jun25	C5	Control	2			Jul8	C5	Control	0
	Jun25	C6	Control	0			Jul8	C6	Control	0
	Jun25	C7	Control	4			Jul8	C7	Control	0
	Jun25	C8	Control	4			Jul8	C8	Control	0
	Jun25	C9	Control	2			Jul8	C9	Control	0
	Jun25	C10	Control	1			Jul8	C10	Control	0
	Jul2	C1	Control	6			Jul15	C1	Control	0
	Jul2	C2	Control	1			Jul15	C2	Control	0
	Jul2	C3	Control	7			Jul15	C3	Control	0
	Jul2	C4	Control	2			Jul15	C4	Control	0
	Jul2	C5	Control	4			Jul15	C5	Control	0
	Jul2	C6	Control	0			Jul15	C6	Control	0
	Jul2	C7	Control	2			Jul15	C7	Control	0
	Jul2	C8	Control	11			Jul15	C8	Control	0
	Jul2	C9	Control	6			Jul15	C9	Control	0
	Jul2	C10	Control	8			Jul15	C10	Control	0
	Jul17	C1	Control	0			Aug9	C1	Control	0
	Jul17	C2	Control	0			Aug9	C2	Control	0
	Jul17	C3	Control	0			Aug9	C3	Control	2
	Jul17	C4	Control	0			Aug9	C4	Control	2
	Jul17	C5	Control	0			Aug9	C5	Control	6
	Jul17	C6	Control	2			Aug9	C6	Control	7
	Jul17	C7	Control	1			Aug9	C7	Control	1
	Jul17	C8	Control	5			Aug9	C8	Control	1
	Jul17	C9	Control	1			Aug9	C9	Control	0
	Jul17	C10	Control	1			Aug9	C10	Control	0
	Jul22	C1	Control	0			Aug18	C1	Control	0
	Jul22	C2	Control	0			Aug18	C2	Control	0
	Jul22	C3	Control	0			Aug18	C3	Control	0
	Jul22	C4	Control	2			Aug18	C4	Control	0
	Jul22	C5	Control	0			Aug18	C5	Control	0
	Jul22	C6	Control	0			Aug18	C6	Control	1
	Jul22	C7	Control	1			Aug18	C7	Control	0
	Jul22	C8	Control	1			Aug18	C8	Control	1
	Jul22	C9	Control	4			Aug18	C9	Control	0
	Jul22	C10	Control	0			Aug18	C10	Control	1
	Aug4	C1	Control	1			Aug31	C1	Control	0
	Aug4	C2	Control	0			Aug31	C2	Control	0
	Aug4	C3	Control	0			Aug31	C3	Control	0
	Aug4	C4	Control	0			Aug31	C4	Control	1
	Aug4	C5	Control	0			Aug31	C5	Control	0
	Aug4	C6	Control	0			Aug31	C6	Control	0
	Aug4	C7	Control	0			Aug31	C7	Control	0
	Aug4	C8	Control	1			Aug31	C8	Control	0
	Aug4	C9	Control	1			Aug31	C9	Control	0
	Aug4	C10	Control	0			Aug31	C10	Control	0
	Aug26	C1	Control	0			Jul8	T1	Treated	0
	Aug26	C2	Control	0			Jul8	T2	Treated	0
	Aug26	C3	Control	0			Jul8	T3	Treated	1
	Aug26	C4	Control	0			Jul8	T4	Treated	0
	Aug26	C5	Control	0			Jul8	T5	Treated	1
	Aug26	C6	Control	0			Jul8	T6	Treated	10
	Aug26	C7	Control	0			Jul8	T7	Treated	0
	Aug26	C8	Control	0			Jul8	T8	Treated	0
	Aug26	C9	Control	1			Jul8	T9	Treated	0
	Aug26	C10	Control	0			Jul8	T10	Treated	0
	Sep3	C1	Control	1			Jul15	T1	Treated	0
	Sep3	C2	Control	0			Jul15	T2	Treated	0
	Sep3	C3	Control	0			Jul15	T3	Treated	0
	Sep3	C4	Control	0			Jul15	T4	Treated	0
	Sep3	C5	Control	0			Jul15	T5	Treated	0
	Sep3	C6	Control	0			Jul15	T6	Treated	0
	Sep3	C7	Control	0			Jul15	T7	Treated	0
	Sep3	C8	Control	0			Jul15	T8	Treated	0
	Sep3	C9	Control	0			Jul15	T9	Treated	0
	Sep3	C10	Control	0			Jul15	T10	Treated	0
	Sep10	C1	Control	0			Aug9	T1	Treated	0
	Sep10	C2	Control	0			Aug9	T2	Treated	1
	Sep10	C3	Control	0			Aug9	T3	Treated	0
	Sep10	C4	Control	0			Aug9	T4	Treated	0
	Sep10	C5	Control	0			Aug9	T5	Treated	2
	Sep10	C6	Control	0			Aug9	T6	Treated	0
	Sep10	C7	Control	0			Aug9	T7	Treated	1
	Sep10	C8	Control	0			Aug9	T8	Treated	1
	Sep10	C9	Control	0			Aug9	T9	Treated	5
	Sep10	C10	Control	0			Aug9	T10	Treated	2
	Jun25	T1	Treated	0			Aug18	T1	Treated	1
	Jun25	T2	Treated	0			Aug18	T2	Treated	2
	Jun25	T3	Treated	1			Aug18	T3	Treated	1
	Jun25	T4	Treated	0			Aug18	T4	Treated	0
	Jun25	T5	Treated	1			Aug18	T5	Treated	0
	Jun25	T6	Treated	0			Aug18	T6	Treated	2
	Jun25	T7	Treated	1			Aug18	T7	Treated	2
	Jun25	T8	Treated	3			Aug18	T8	Treated	0
	Jun25	T9	Treated	1			Aug18	T9	Treated	1
	Jun25	T10	Treated	1			Aug18	T10	Treated	1
	Jul2	T1	Treated	7			Aug31	T1	Treated	0
	Jul2	T2	Treated	8			Aug31	T2	Treated	0
	Jul2	T3	Treated	5			Aug31	T3	Treated	0
	Jul2	T4	Treated	3			Aug31	T4	Treated	0
	Jul2	T5	Treated	0			Aug31	T5	Treated	0
	Jul2	T6	Treated	1			Aug31	T6	Treated	0
	Jul2	T7	Treated	3			Aug31	T7	Treated	0
	Jul2	T8	Treated	14			Aug31	T8	Treated	0
	Jul2	T9	Treated	4			Aug31	T9	Treated	0
	Jul2	T10	Treated	6			Aug31	T10	Treated	0
	Jul17	T1	Treated	0
	Jul17	T2	Treated	1
	Jul17	T3	Treated	1
	Jul17	T4	Treated	1
	Jul17	T5	Treated	1
	Jul17	T6	Treated	1
	Jul17	T7	Treated	0
	Jul17	T8	Treated	1
	Jul17	T9	Treated	0
	Jul17	T10	Treated	0
	Jul22	T1	Treated	0
	Jul22	T2	Treated	0
	Jul22	T3	Treated	0
	Jul22	T4	Treated	1
	Jul22	T5	Treated	0
	Jul22	T6	Treated	0
	Jul22	T7	Treated	0
	Jul22	T8	Treated	0
	Jul22	T9	Treated	0
	Jul22	T10	Treated	0
	Aug4	T1	Treated	0
	Aug4	T2	Treated	0
	Aug4	T3	Treated	0
	Aug4	T4	Treated	0
	Aug4	T5	Treated	0
	Aug4	T6	Treated	0
	Aug4	T7	Treated	0
	Aug4	T8	Treated	0
	Aug4	T9	Treated	0
	Aug4	T10	Treated	1
	Aug26	T1	Treated	0
	Aug26	T2	Treated	1
	Aug26	T3	Treated	0
	Aug26	T4	Treated	1
	Aug26	T5	Treated	0
	Aug26	T6	Treated	0
	Aug26	T7	Treated	0
	Aug26	T8	Treated	1
	Aug26	T9	Treated	1
	Aug26	T10	Treated	22
	Sep3	T1	Treated	0
	Sep3	T2	Treated	0
	Sep3	T3	Treated	0
	Sep3	T4	Treated	0
	Sep3	T5	Treated	0
	Sep3	T6	Treated	1
	Sep3	T7	Treated	0
	Sep3	T8	Treated	0
	Sep3	T9	Treated	0
	Sep3	T10	Treated	0
	Sep10	T1	Treated	0
	Sep10	T2	Treated	0
	Sep10	T3	Treated	0
	Sep10	T4	Treated	0
	Sep10	T5	Treated	0
	Sep10	T6	Treated	0
	Sep10	T7	Treated	0
	Sep10	T8	Treated	0
	Sep10	T9	Treated	0
	Sep10	T10	Treated	0
